# Supplementary material for: Cognitive frailty in relation to adverse health outcomes independent of multimorbidity: results from the China health and retirement longitudinal study
Source: Aging (Albany NY). 2020 Nov 18;12(22):23129–45. doi: 10.18632/aging.104078 (PMC7746379; doi:10.18632/aging.104078)
Supplement: Supplementary Tables [file aging-12-104078-s001..pdf]

## SUPPLEMENTARY TABLES

**Supplementary Table 1. Summary of the compatible studies mentioned in our study.**

| First author      | Year | Country   | N    | Age   | study types           | Frailty criteria | Cognition | BADL | IADL | Mobility disability | Hospitalization | Mortality |
|-------------------|------|-----------|------|-------|-----------------------|------------------|-----------|------|------|---------------------|-----------------|-----------|
| Aliberti MJ[7]    | 2019 | USA       | 7338 | ≥65   | 6 years longitudinal  | Fried PF         | HRS tests | ↑    | /    | /                   | /               | ↑         |
| Avila-Funes JA[8] | 2009 | French    | 6030 | 65-95 | 4 years longitudinal  | Fried PF         | MMSE      | ↑    | ↑    | ↑                   | ↑               | →         |
| Feng L[9]         | 2017 | Singapore | 2375 | ≥55   | 6 years longitudinal  | Fried PF         | MMSE      | ↑    | ↑    | /                   | →               | ↑         |
| John PDS[10]      | 2017 | Canada    | 1751 | ≥65   | 5 years longitudinal  | FI               | MMSE      | /    | /    | /                   | /               | ↑         |
| Cano C[11]        | 2012 | USA       | 1815 | ≥67   | 10 years longitudinal | Fried PF         | MMSE      | /    | /    | /                   | /               | →         |
| Solfrizzi V[12]   | 2017 | Italian   | 2373 | 65-84 | 4 years longitudinal  | Fried PF         | MMSE      | /    | /    | /                   | /               | ↑         |
| Solfrizzi V[13]   | 2017 | Italian   | 2150 | 65-84 | 7 years longitudinal  | Fried PF         | MMSE      | /    | /    | /                   | /               | ↑         |
| Yu R[14]          | 2018 | China     | 3491 | ≥65   | 12 years longitudinal | Fried PF         | MMSE      | /    | /    | ↑                   | ↑               | ↑         |
| Shimada H[15]     | 2016 | Japan     | 8864 | ≥65   | cross-sectional       | Fried PF         | NCGG-FAT  | /    | ↑    | /                   | /               | /         |
| Z Liu[23]         | 2018 | USA       | 754  | ≥70   | 11 years longitudinal | Fried PF         | MMSE      | ↑    | ↑    | ↑                   | →               |           |
| Roppolo M[S1]     | 2016 | Italian   | 594  | ≥65   | cross-sectional       | Fried PF         | MMSE      | /    | /    | ↑                   | /               | /         |

BADL, basic activity of daily living; IADL, instrumental activity of daily living; Fried PF, Fried physical frailty; FI, frailty index; MMSE, Mini-mental State Examination; NCGG-FAT, National Center for Geriatrics and Gerontology-Functional Assessment Tool; MCA, Montreal Cognitive Assessment.

↑, refers to cognitive frailty was associated with increased risk of adverse health outcomes; →, refers to no statistically significant association; /, refers to do not mention.

[7-15, 23] keep the same citation with Manuscript Text.

**Supplementary Table 2. Mutually controlled associations of cognitive impairment and physical frailty with disability (BADL, IADL, and mobility), hospitalization, and death in full sample, CHARLS 2011-2015.**

|                               | BADL disability  | IADL disability  | Mobility disability | Hospitalization  | Death            |
|-------------------------------|------------------|------------------|---------------------|------------------|------------------|
| <b>Individual effect/ No.</b> | 3341             | 3226             | 1685                | 3776             | 5113             |
| <b>Cognition</b>              |                  |                  |                     |                  |                  |
| Normal cognition              | Ref.             | Ref.             | Ref.                | Ref.             | Ref.             |
| Cognitive impairment          | 1.39 (1.13–1.71) | 2.10 (1.69–2.61) | 1.53 (1.06–2.21)    | 1.13 (0.93–1.38) | 1.53 (1.16–2.01) |
| <b>Physical frailty</b>       |                  |                  |                     |                  |                  |
| Nonfrail                      | Ref.             | Ref.             | Ref.                | Ref.             | Ref.             |
| Frail                         | 2.34 (1.63–3.37) | 2.39 (1.60–3.57) | 1.52 (0.64–3.60)    | 1.36 (1.01–1.82) | 2.01 (1.48–2.72) |

CHARLS, the China Health and Retirement Longitudinal Study; BADL, basic activities of daily living; IADL, instrumental activities of daily living.

As described in Methods, we ran a logistic regression model for each health outcome (e.g., BADL disability) in participants who did not have exposure for that outcome at baseline (i.e., N=3341 participants without BADL disability at baseline). Odds ratios (ORs) and corresponding 95% confidence interval (CI) are presented. The model adjusted for age, gender, cognition, and physical frailty.

**Supplementary Table 3. Associations of multimorbidity with disability (BADL, IADL, and mobility), hospitalization, and death in full sample, CHARLS 2011-2015.**

|                     | <b>BADL disability</b> | <b>IADL disability</b> | <b>Mobility disability</b> | <b>Hospitalization</b> | <b>Death</b>     |
|---------------------|------------------------|------------------------|----------------------------|------------------------|------------------|
| Multimorbidity /No. | 3341                   | 3226                   | 1685                       | 3776                   | 5113             |
| No                  | Ref.                   | Ref.                   | Ref.                       | Ref.                   | Ref.             |
| Yes                 | 2.10 (1.81–2.44)       | 1.92 (1.65–2.23)       | 1.95 (1.54–2.47)           | 1.81 (1.57–2.09)       | 1.26 (1.03–1.54) |

CHARLS, the China Health and Retirement Longitudinal Study; BADL, basic activities of daily living; IADL, instrumental activities of daily living.

As described in Methods, we ran a logistic regression model for each health outcome (e.g., BADL disability) in participants who did not have exposure for that outcome at baseline (i.e., N=3341 participants without BADL disability at baseline). Odds ratios (ORs) and corresponding 95% confidence interval (CI) are presented. The model adjusted for age and gender.

**Supplementary Table 4. Associations of cognitive impairment and frailty with disability, hospitalization, and death in sample after removing those with memory problem, CHARLS 2011-2015.**

|                                 | <b>BADL disability</b> | <b>IADL disability</b> | <b>Mobility disability</b> | <b>Hospitalization</b> | <b>Death</b>     |
|---------------------------------|------------------------|------------------------|----------------------------|------------------------|------------------|
| <b>Individual effect</b>        |                        |                        |                            |                        |                  |
| <b>Cognition</b>                |                        |                        |                            |                        |                  |
| Normal cognition                | Ref.                   | Ref.                   | Ref.                       | Ref.                   | Ref.             |
| Cognitive impairment            | 1.39 (1.13–1.71)       | 2.11 (1.69–2.63)       | 1.54 (1.07–2.23)           | 1.11 (0.91–1.36)       | 1.57 (1.19–2.07) |
| <b>Physical frailty</b>         |                        |                        |                            |                        |                  |
| Nonfrail                        | Ref.                   | Ref.                   | Ref.                       | Ref.                   | Ref.             |
| Frail                           | 2.34 (1.61–3.38)       | 2.48 (1.66–3.72)       | 1.46 (0.61–3.49)           | 1.38 (1.03–1.87)       | 2.05 (1.50–2.80) |
| <b>Combined effect</b>          |                        |                        |                            |                        |                  |
| Normal cognition & Nonfrail     | Ref.                   | Ref.                   | Ref.                       | Ref.                   | Ref.             |
| Cognitive impairment & Nonfrail | 1.40 (1.13–1.73)       | 2.12 (1.69–2.65)       | 1.52 (1.05–2.20)           | 1.15 (0.93–1.41)       | 1.41 (1.04–1.92) |
| Normal cognition & Frail        | 2.48 (1.64–3.73)       | 2.54 (1.65–3.92)       | 1.33 (0.54–3.22)           | 1.53 (1.09–2.15)       | 1.80 (1.25–2.60) |
| Cognitive impairment & Frail    | 2.32 (1.01–5.32)       | 4.13 (1.40–12.15)      | 1*                         | 1.06 (0.56–2.02)       | 3.76 (2.14–6.61) |

CHARLS, the China Health and Retirement Longitudinal Study; BADL, basic activities of daily living; IADL, instrumental activities of daily living.

As described in Methods, we ran a logistic regression model for each health outcome (e.g., BADL disability) in participants who did not have exposure for that outcome at baseline (i.e., N=3341 participants without BADL disability at baseline). Odds ratios (ORs) and corresponding 95% confidence interval (CI) are presented. The model adjusted for age and gender.

\*Since all participants in this subgroup reported the health outcome over the follow-up period, we assigned 1 to them.

**Supplementary Table 5. Associations of cognitive impairment and frailty with disability and hospitalization accounting for the competing risk of death, CHARLS 2011-2015**

|                                 | <b>BADL disability</b> | <b>IADL disability</b> | <b>Mobility disability</b> | <b>Hospitalization</b> |
|---------------------------------|------------------------|------------------------|----------------------------|------------------------|
| <b>Individual effect</b>        |                        |                        |                            |                        |
| <b>Cognition</b>                |                        |                        |                            |                        |
| Normal cognition                | Ref.                   | Ref.                   | Ref.                       | Ref.                   |
| Cognitive impairment            | 1.27 (1.10–1.47)       | 1.63 (1.42–1.86)       | 1.17 (1.02–1.34)           | 1.06 (0.86–1.32)       |
| <b>Physical frailty</b>         |                        |                        |                            |                        |
| Nonfrail                        | Ref.                   | Ref.                   | Ref.                       | Ref.                   |
| Frail                           | 1.57 (1.28–1.93)       | 1.82 (1.48–2.24)       | 1.17 (0.89–1.55)           | 1.40 (1.06–1.87)       |
| <b>Combined effect</b>          |                        |                        |                            |                        |
| Normal cognition & Nonfrail     | Ref.                   | Ref.                   | Ref.                       | Ref.                   |
| Cognitive impairment & Nonfrail | 1.31 (1.13–1.52)       | 1.65 (1.44–1.90)       | 1.17 (1.02–1.34)           | 1.09 (0.87–1.36)       |

|                              |                  |                  |                  |                  |
|------------------------------|------------------|------------------|------------------|------------------|
| Normal cognition & Frail     | 1.75 (1.40–2.19) | 1.92 (1.53–2.40) | 1.16 (0.84–1.60) | 1.49 (1.09–2.04) |
| Cognitive impairment & Frail | 1.24 (0.77–2.01) | 2.16 (1.32–3.52) | 1.46 (1.10–1.94) | 1.18 (0.62–2.24) |

CHARLS, the China Health and Retirement Longitudinal Study; BADL, basic activities of daily living; IADL, instrumental activities of daily living.

As described in Methods, we ran a competing risk Cox regression model for each health outcome (e.g., BADL disability) in participants who did not have exposure for that outcome at baseline (i.e., N=3341 participants without BADL disability at baseline). Hazard ratios (HRs) and corresponding 95% confidence interval (CI) are presented. The model adjusted for age and gender.

\*Since all participants in this subgroup reported the health outcome over the follow-up period, we assigned 1 to them.

**Supplementary Table 6. Cross-sectional associations of cognitive impairment and frailty with disability and hospitalization at baseline, CHARLS 2011.**

|                                 | <b>BADL disability</b> | <b>IADL disability</b> | <b>Mobility disability</b> | <b>Hospitalization</b> |
|---------------------------------|------------------------|------------------------|----------------------------|------------------------|
| No.                             | 1130                   | 1289                   | 3199                       | 602                    |
| <b>Individual effect</b>        |                        |                        |                            |                        |
| Cognition                       |                        |                        |                            |                        |
| Normal cognition                | Ref.                   | Ref.                   | Ref.                       | Ref.                   |
| Cognitive impairment            | 1.88 (1.58–2.22)       | 2.51 (2.14–2.96)       | 1.67 (1.41–1.99)           | 0.96 (0.75–1.22)       |
| Physical frailty                |                        |                        |                            |                        |
| Nonfrail                        | Ref.                   | Ref.                   | Ref.                       | Ref.                   |
| Frail                           | 3.83 (3.04–4.82)       | 4.58 (3.62–5.79)       | 5.03 (3.51–7.20)           | 1.61 (1.20–2.17)       |
| <b>Combined effect</b>          |                        |                        |                            |                        |
| Normal cognition & Nonfrail     | Ref.                   | Ref.                   | Ref.                       | Ref.                   |
| Cognitive impairment & Nonfrail | 1.84 (1.53–2.21)       | 2.46 (2.07–2.92)       | 1.59 (1.33–1.90)           | 0.93 (0.72–1.21)       |
| Normal cognition & Frail        | 3.90 (3.00–5.07)       | 4.53 (3.47–5.91)       | 4.57 (3.11–6.72)           | 1.60 (1.14–2.25)       |
| Cognitive impairment & Frail    | 5.57 (3.55–8.74)       | 9.34 (5.66–15.42)      | 11.14 (4.06–30.57)         | 1.57 (0.87–2.82)       |

CHARLS, the China Health and Retirement Longitudinal Study; BADL, basic activities of daily living; IADL, instrumental activities of daily living.

As described in Methods, we ran a logistic regression model for each health outcome (e.g., BADL disability) at baseline. Odds ratios (ORs) and corresponding 95% confidence interval (CI) are presented. All models were adjusted for age and gender.

## REFERENCE

1. Roppolo M, Mulasso A, Rabaglietti E. Cognitive Frailty in Italian Community-Dwelling Older Adults: Prevalence Rate and Its Association with Disability. J Nutr Health Aging. 2017; 21:631–636.  
<https://doi.org/10.1007/s12603-016-0828-5>  
PMID:[28537326](#)
